# Supplementary material for: Both tails and the centromere targeting domain of CENP-A are required for centromere establishment
Source: PubMed Central journal article supplement — J Cell Biol. 2015 Mar 2;208(5):521–31. doi: 10.1083/jcb.201412011 (PMC4347640; doi:10.1083/jcb.201412011), 2015-03-02
Supplement: supp_jcb.201412011_JCB_201412011_sm.pdf [file supp_jcb.201412011_JCB_201412011_sm.pdf]

Logsdon et al., <http://www.jcb.org/cgi/content/full/jcb.201412011/DC1>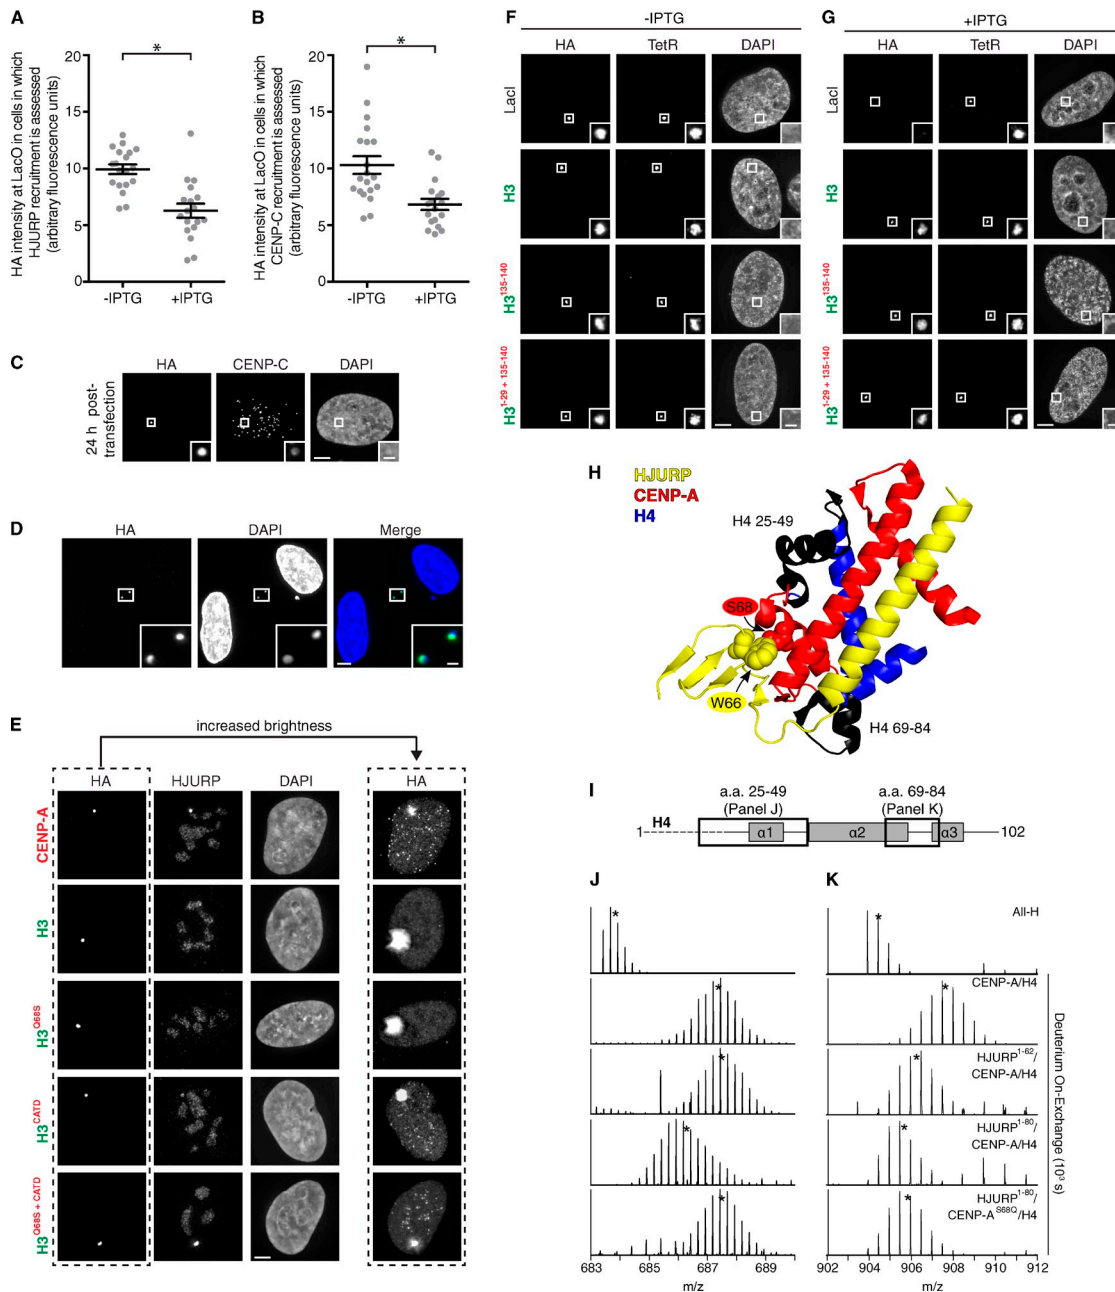

**Figure S1. A significant subset of LacI-tagged chimeras remain at the LacO array upon IPTG treatment while LacI alone is removed, low levels of CENP-C are recruited to the LacO array by LacI-CENP-A at 24 h, missegregation of the LacO-containing chromosome begins to occur at 48 h, LacI-fused H3/CENP-A chimeras containing the CATD localize to endogenous centromeres, and Ser68 of CENP-A transmits stability to distant helices within histone H4.** (A and B) Quantitation of HA-LacI-CENP-A intensity at the LacO array,  $\pm$ IPTG treatment, in cells in which HJURP (A; Fig. 1, B and C) and CENP-C (B; Fig. 1, D and E) levels are assessed. Error bars show SEM. (C) Rare example of a cell in which low levels of CENP-C are recruited to the LacO array 24 h after transfection of LacI-CENP-A in U2OS-LacO cells. (D) Example of a cell in which missegregation of the LacO array has occurred at 48 h after transfection of LacI-CENP-A in U2OS-LacO cells. (E) Increased brightness of the HA channel from Fig. 1 J, showing that CATD-containing chimeras localize to endogenous centromeres in addition to the dominant localization at the LacO array. (F and G) Representative images of HA-LacI, HA-LacI-H3, or HA-LacI-H3/CENP-A chimeras at the LacO array in U2OS-LacO cells,  $\pm$ IPTG treatment. TetR, tetracycline receptor. (H) Structure of the HJURP-CENP-A-H4 complex (PDB accession no. 3R45). H4 positions corresponding to the peptides shown in I-K (aa 25-49 and aa 69-84) are in black. (I) Diagram of H4 secondary structure with black boxes corresponding to aa 25-49 and aa 69-84. Peptides of these regions are shown in J and K. (J and K) Raw HX-mass spectrometry data for the H4 peptide corresponding to aa 25-49 (J) and the H4 peptide corresponding to aa 69-84 (K) for the indicated complexes. Data for the CENP-A-H4 complex and HJURP<sup>1-62</sup>-CENP-A-H4 are reproduced from Bassett et al. (2012). Data for the 10<sup>3</sup> s time point are shown because the aa 25-49 peptide is fully exchanged at later time points. The S68Q mutation in CENP-A completely abrogates the protection from HX of aa 25-49 of H4, as seen with HJURP<sup>1-80</sup> bound to wild-type CENP-A (J). However, the S68Q mutation does not alter binding of HJURP to CENP-A-H4 because of the identical protection observed at other locations (see K for an example peptide of aa 69-84 of H4). m/z, mass per charge. \*,  $P < 0.05$ . Insets show magnification of the boxed regions. Bars: (main images) 5  $\mu$ m; (insets) 1  $\mu$ m.

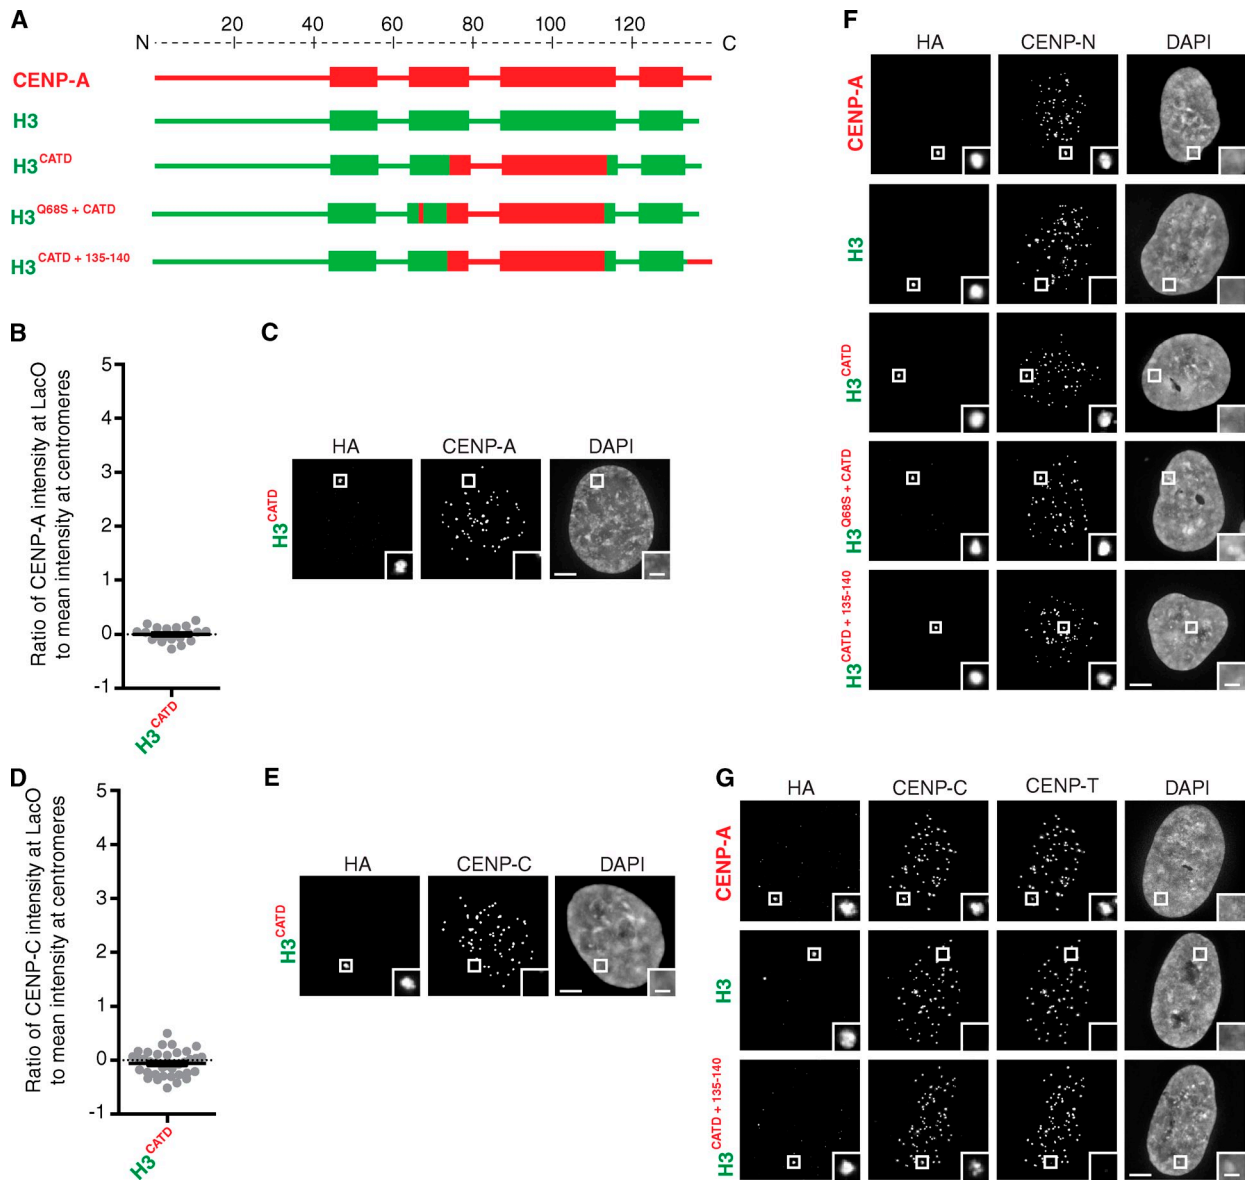

Figure S2. **LacI-H3<sup>CATD</sup> does not recruit detectable levels of CENP-A or CENP-C to the LacO array, CATD-containing constructs recruit CENP-N to the LacO array, and LacI-H3<sup>CATD+135-140</sup> recruits CENP-C but not CENP-T to the LacO array.** (A) Diagram of the H3/CENP-A chimeras targeted to the LacO array in U2OS-LacO cells. (B and D) Quantitation of CENP-A (B) and CENP-C (D) intensity at the LacO array normalized to the mean intensity at endogenous centromeres for HA-LacI-H3<sup>CATD</sup>. Error bars show SEM. (C and E) Representative images of CENP-A (C) and CENP-C (E) recruitment to the LacO array by HA-LacI-H3<sup>CATD</sup>. (F) Representative images of CENP-N recruitment to the LacO array by the indicated chimeric histones fused to LacI and an HA tag. (G) Representative images of CENP-C and CENP-T recruitment to the same LacO array by the indicated chimeric histones fused to LacI and an HA tag. Insets show magnification of the boxed regions. Bars: (main images) 5  $\mu$ m; (insets) 1  $\mu$ m.

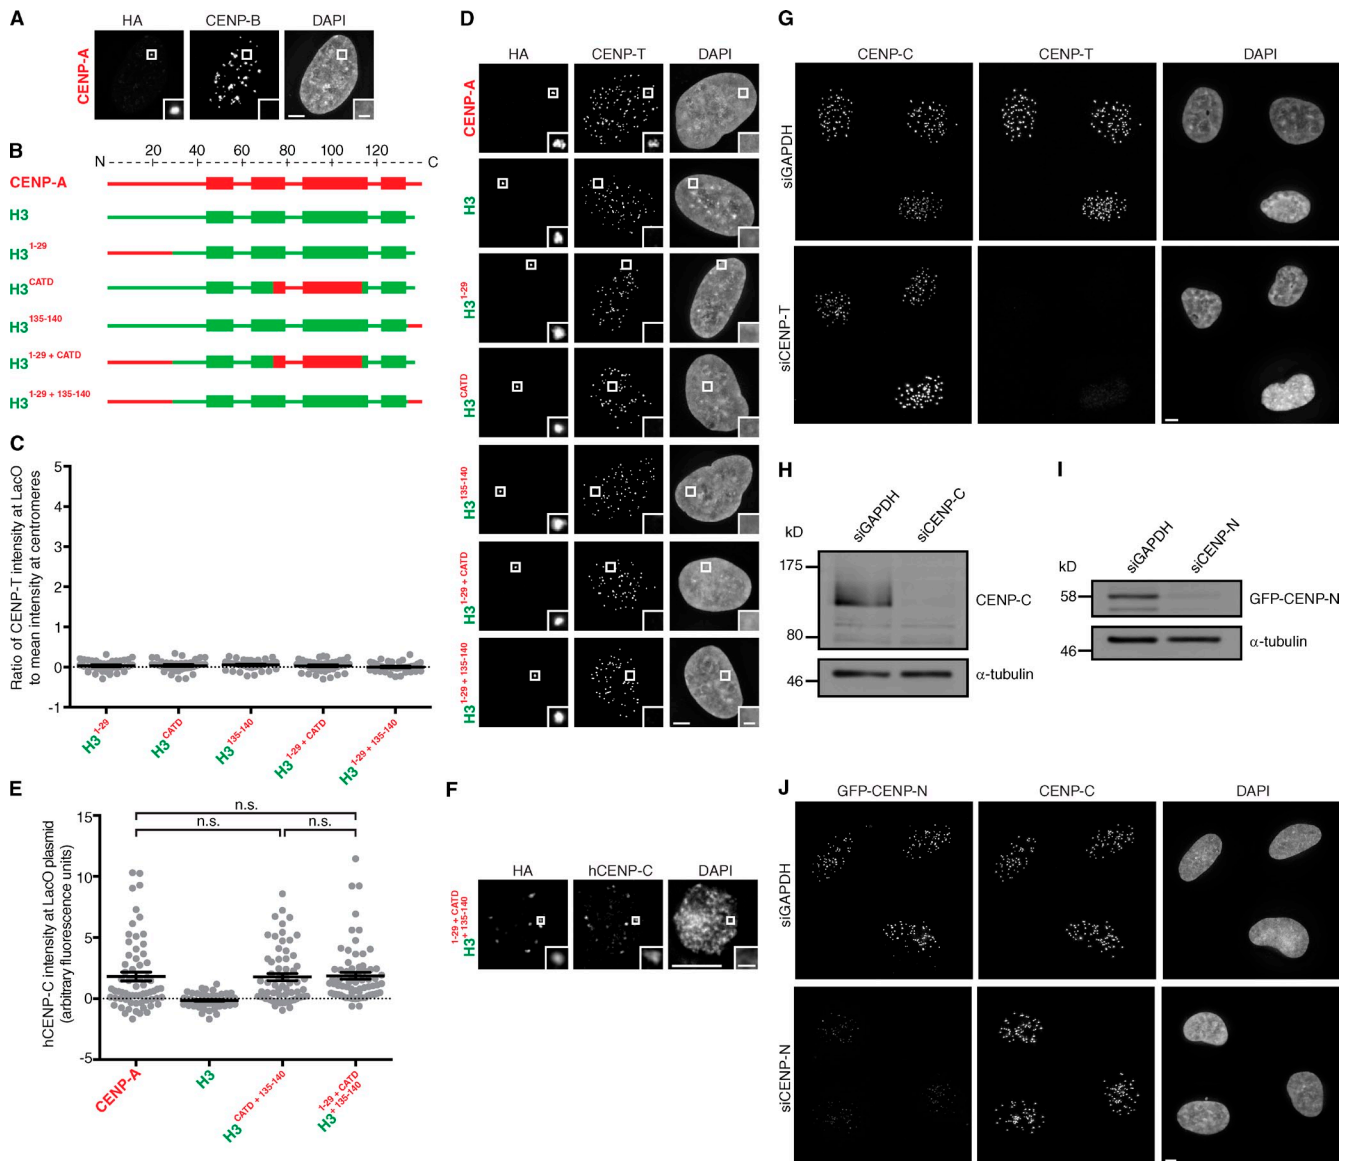

**Figure S3. CENP-B is not recruited to the LacO array by LacI-CENP-A, LacI-tagged chimeric histones containing combinations of the CATD and N- and C-terminal tails of CENP-A do not recruit CENP-T to the LacO array, LacI-H3<sup>1-29+CATD+135-140</sup> does not enhance CENP-C recruitment to the LacO-containing plasmid in *Drosophila* S2 cells, and CENP-T, CENP-C, and CENP-N are depleted after siRNA treatment.** (A) Representative image of CENP-B recruitment to the LacO array by HA-LacI-CENP-A. (B) Diagram of the H3/CENP-A chimeric histones targeted to the LacO array in U2OS-LacO cells and assessed for recruitment of CENP-T. (C) Quantitation of CENP-T intensity at the LacO array normalized to the mean intensity at endogenous centromeres for the indicated chimeric histones fused to LacI and an HA tag. (D) Representative images of CENP-T recruitment to the LacO array by the indicated chimeric histones fused to LacI and an HA tag. (E) Quantitation of hCENP-C intensity at the LacO-containing plasmids targeted by HA-LacI-H3/CENP-A chimeras in *Drosophila* S2 cells. Data points for HA-LacI-tagged CENP-A, H3, and H3<sup>CATD+135-140</sup> are reproduced from Fig. 3. Error bars show SEM. (F) Representative image of hCENP-C recruitment to LacO-containing plasmids by HA-LacI-H3<sup>1-29+CATD+135-140</sup> in *Drosophila* S2 cells. (G) Representative images of U2OS-LacO cells treated with GAPDH or CENP-T siRNA. CENP-T levels are reduced to  $8.1 \pm 2.7\%$  in cells treated with CENP-T siRNA relative to cells treated with GAPDH siRNA. (H) Immunoblots with anti-CENP-C or anti- $\alpha$ -tubulin of whole cell lysates from U2OS-LacO cells after treatment with GAPDH or CENP-T siRNA. (I) Immunoblots with anti-GFP or anti- $\alpha$ -tubulin of whole cell lysates from U2OS-LacO cells stably expressing GFP-tagged CENP-N after treatment with GAPDH or CENP-N siRNA. (J) Representative images of U2OS-LacO cells stably expressing GFP-tagged CENP-N after treatment with GAPDH or CENP-N siRNA. Insets show magnification of the boxed regions. Bars: (main images) 5  $\mu$ m; (insets, except F) 1  $\mu$ m; (F, inset) 0.5  $\mu$ m.

## Reference

Bassett, E.A., J. DeNizio, M.C. Barnhart-Dailey, T. Panchenko, N. Sekulic, D.J. Rogers, D.R. Foltz, and B.E. Black. 2012. HJURP uses distinct CENP-A surfaces to recognize and to stabilize CENP-A/histone H4 for centromere assembly. *Dev. Cell.* 22:749–762. <http://dx.doi.org/10.1016/j.devcel.2012.02.001>
